# Supplementary material
Source: publisher figshare collection journal article supplement (https://acs.figshare.com/ndownloader/files/16450244)
Supplement: Supplementary file 1 [file 16450244]

## ***In situ* Vibrational Probes of Epoxy Gelation**

Lérys Granado<sup>1,2,3\*</sup>, Stefan Kempa<sup>1\*</sup>, Laurence John Gregoriades<sup>1</sup>, Frank Brüning<sup>1</sup>, Anne-Caroline Genix<sup>2</sup>, Jean-Louis Bantignies<sup>2</sup>, Nicole Fréty<sup>3</sup> and Eric Anglaret<sup>2</sup>

<sup>1</sup> Atotech Deutschland GmbH, Erasmusstraße 20, 10553 Berlin, Germany

<sup>2</sup> L2C, Univ. Montpellier, CNRS, 34095 Montpellier, France

<sup>3</sup> ICGM, Univ. Montpellier, CNRS, 34095 Montpellier, France

\* Corresponding Authors: [lerys.granado@live.fr](mailto:lerys.granado@live.fr) and [stefan.kempa@atotech.com](mailto:stefan.kempa@atotech.com)

Total number of figure: 6. Total number of page: 4.

### **Table of Content**

|                                                                |   |
|----------------------------------------------------------------|---|
| 1. Characterization of system (A).....                         | 2 |
| 1. Fillers Characterization.....                               | 2 |
| 2. Glass transition temperature.....                           | 2 |
| 3. Stoichiometry epoxy:hardener (r) by <sup>1</sup> H NMR..... | 2 |
| 4. Hardener functionality (f) by MALDI-ToF .....               | 3 |
| 2. NIR cure monitoring of system (B) .....                     | 4 |
| 3. NIR cure monitoring of system (C).....                      | 4 |

# 1. Characterization of system (A)

## 1. Fillers Characterization

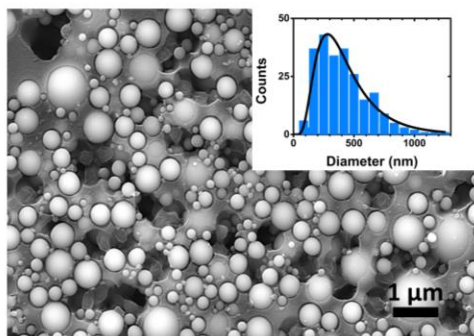

**Figure S1.** Scanning electron micrograph of the composite surface revealing the glass fillers (secondary electron mode). Inset: filler diameter distribution as determined from image analysis (centered near 300 nm).

## 2. Glass transition temperature

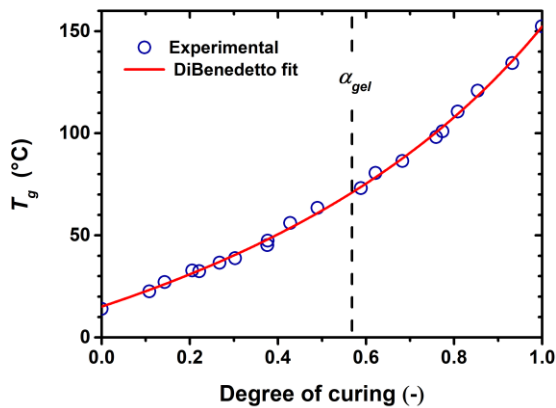

**Figure S2.** Evolution of the glass transition temperature as a function of the degree of curing, determined using DSC at 10 K/min.

## 3. Stoichiometry epoxy:hardener ( $r$ ) by $^1\text{H}$ NMR

The uncured polymer matrix was dissolved in  $\text{CDCl}_3$  and filtered, and the NMR spectrum was acquired on a Bruker AC-400 spectrometer. The spectrum of the polymer matrix is displayed in Figure S3. Oxirane protons are observed at 2.6-2.9 ppm ( $\text{OCH}_2$ ) and 3.4-3.5 (OCH). The peaks in the range 3.7-4.5 ppm are assigned to two types of protons: ( $-\text{O}-\text{CH}_2$ ) from the glycidyl moieties of epoxy and ( $-\text{CH}_2-$ ) of methylene bridge of the phenol-formaldehyde hardener. The aromatic protons (6.7-8.3 ppm) count theoretically for 4 protons from bisphenolic epoxy and ca. 3 protons for phenol-formaldehyde oligomers (one OH + 2  $\text{CH}_2$  per aromatic ring, see next Figure). The observed aromatic protons count is 6.89, agreeing with the theoretical count in case of stoichiometric ratio ( $= 7$ ). Thus, we estimate the stoichiometric ratio at  $r \sim 1$ .

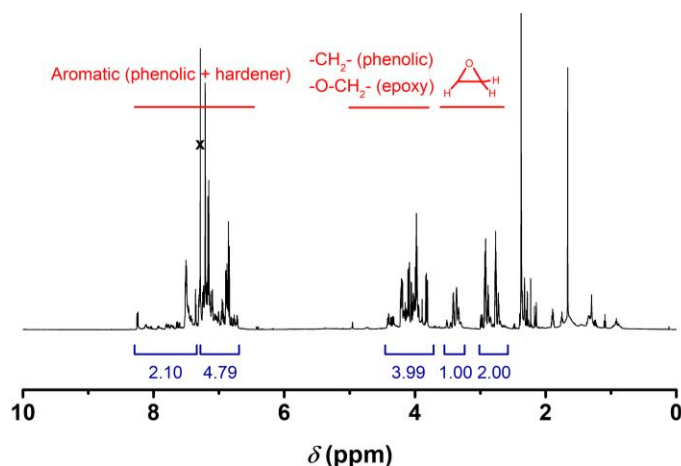

**Figure S3.**  $^1\text{H}$  NMR spectrum of the polymer matrix in  $\text{CDCl}_3$ .

#### 4. Hardener functionality ( $f$ ) by MALDI-ToF

The functionality of the phenol-formaldehyde hardener of system (A) and (B) was investigated by matrix assisted laser desorption/ionization time of flight mass spectrometry (MALDI-ToF). The uncured film was dissolved in acetone and filtered (PTFE 0.22  $\mu\text{m}$ ). 2,5-Dihydroxybenzoic acid (DHB) was used as matrix without any cationising agent. Acetone was used as solvent (mixture polymer:DHB solutions, 1:1, v:v; 1  $\mu\text{L}$  was dried on the target plate). The spectrometer was a Bruker Ultraflex ToF/ToF. The laser wavelength was 337 nm, with an irradiation frequency of 100 Hz. The ions were accelerated with a voltage of +25 kV.

Figure S4a shows a typical MALDI-ToF spectrum. Several incrementing units are identified on the mass spectrum, every forming 8 series of peaks. The observed incrementing molecular weight ( $M_w$ ) of  $106.0 \pm 0.1$  Da perfectly matches with the  $M_w$  of phenol-formaldehyde monomer (phenol + methylene bridge). The 2 most relevant series due to their high intensity are highlighted in colors. Series 1 is associated to  $(M + \text{CH}_2\text{OH} (\text{end group}) + \text{H}^+)$  adduct and series 2 to  $(M + 2 \text{CH}_2\text{OH} (\text{end group}) + \text{DGEBA} + \text{H}^+)$ . The discrepancy between theoretical and observed adducts  $M_w$  is less than 2 Da. For system (A), the distribution of the hardener functionality is then deduced from series 1, leading to a distribution centered on  $f = 4$  (Figure S4b). A very close spectrum was recorded for system (B), therefore the functionality of (B) is considered identical to that of (A).

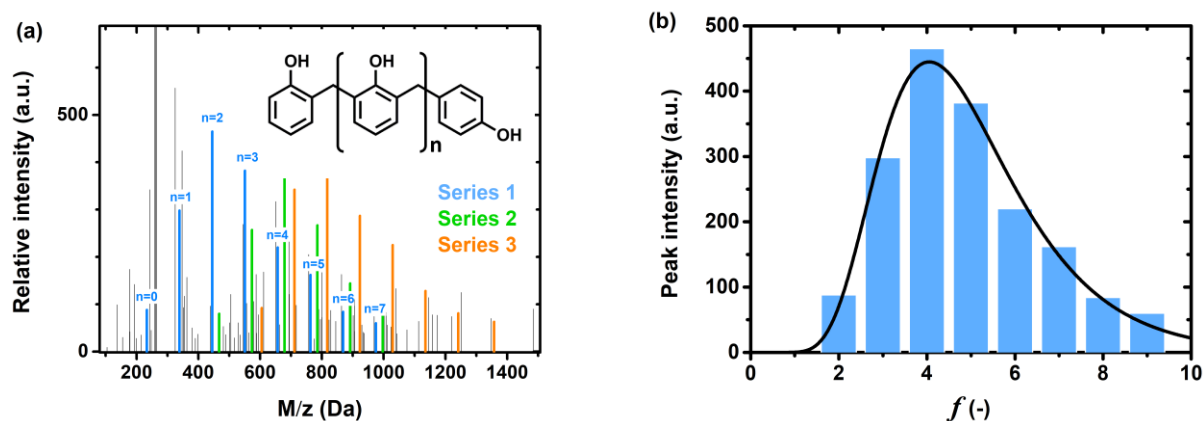

**Figure S4.** (a) MALDI-ToF spectrum of the system (A), with highlighted relevant series with repetition units of 106.0 Da.

(b) Intensity of series 1 peaks as a function of the functionality of hardener (A), distribution centered on  $f=4$ .

## 2. NIR cure monitoring of system (B)

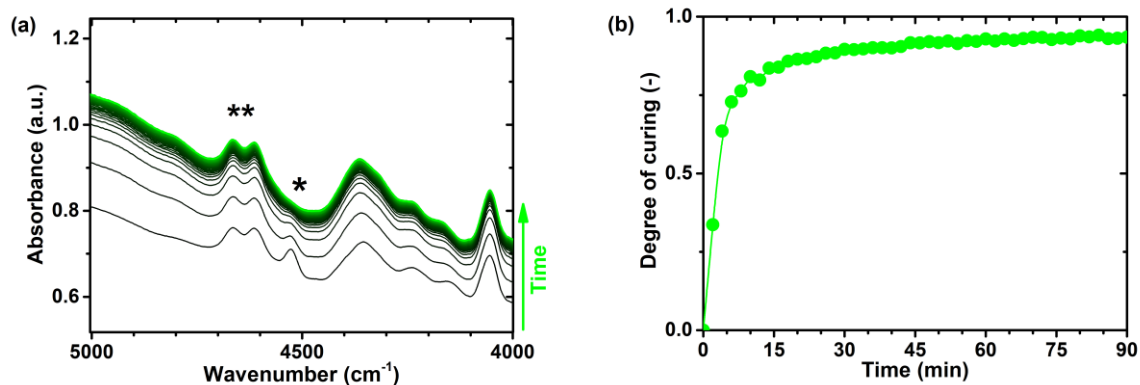

**Figure S5.** (a) Typical NIR spectra during curing of system (B) at 190 °C. (b) Associated kinetic profile.

## 3. NIR cure monitoring of system (C)

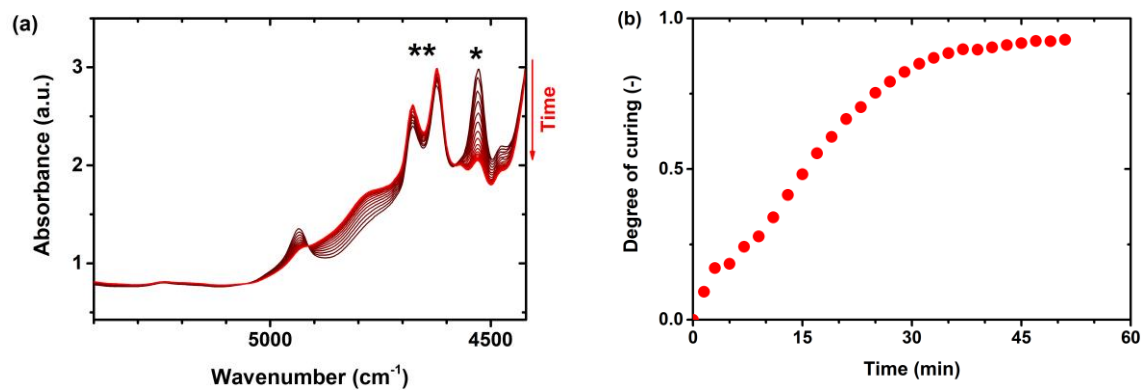

**Figure S6.** (a) Typical NIR spectra during curing of system (C) at 60 °C. (b) Associated kinetic profile.
